# Supplementary material for: Red-shifted optical absorption induced by donor–acceptor–donor π-extended dibenzalacetone derivatives
Source: Royal Society of Chemistry journal article supplement (doi:10.1039/d4ra07256a), 2025-01-01
Supplement: d4ra07256a1.pdf [file d4ra07256a1.pdf]

# Supplementary Materials (ESI) for RSC Advances

## Red-shifted optical absorption induced by donor-acceptor-donor $\pi$ -extended dibenzalacetone derivatives

Vitória M. R. Vasconcelos,<sup>a</sup> Bruna B. Postacchini,<sup>b</sup> Hércio S. dos Santos,<sup>c</sup> Francisco F. M. Cajazeiras,<sup>c</sup> Valder N. Freire,<sup>d</sup> Clodomiro Alves Junior,<sup>f</sup> Cláudia Pessoa,<sup>e</sup> Roner F. da Costa,<sup>f</sup> Igor F. Vasconcelos,<sup>a</sup> and Eveline M. Bezerra<sup>\*f</sup>

<sup>\*</sup>Corresponding author. Email: eveline.bezerra@ufersa.edu.br

This PDF file includes: Tables S1 to S9

**Table S1** Preparation of solutions containing dibenzalacetone derivatives (DBAd) in solvents employed.

| DBAd | Stock Solution<br>mol · L <sup>-1</sup> | Concentration × 10 <sup>-5</sup> mol · L <sup>-1</sup> |                 |                 |                 |                 |
|------|-----------------------------------------|--------------------------------------------------------|-----------------|-----------------|-----------------|-----------------|
|      |                                         | 1 <sup>st</sup>                                        | 2 <sup>nd</sup> | 3 <sup>rd</sup> | 4 <sup>th</sup> | 5 <sup>th</sup> |
| DBA  | 1.7 × 10 <sup>-3</sup>                  | 0.55 (3)                                               | 1.11 (5)        | 1.67 (6)        | 2.25 (5)        | 2.83 (5)        |
| DBC  | 2.1 × 10 <sup>-3</sup>                  | 0.66 (9)                                               | 1.34 (9)        | 2.03 (9)        | 2.72 (9)        | 3.42 (5)        |
| DEP  | 1.6 × 10 <sup>-3</sup>                  | 0.53 (4)                                               | 1.07 (6)        | 1.62 (9)        | 2.17 (9)        | 2.72 (9)        |
| DMA  | 1.9 × 10 <sup>-3</sup>                  | 0.63 (5)                                               | 1.27 (9)        | 1.91 (9)        | 2.57 (9)        | 3.22 (9)        |

<sup>a</sup>Toluene ( $\kappa = 2.37$ ); <sup>b</sup>Dichloromethane ( $\kappa = 8.93$ ); <sup>c</sup>Acetonitrile ( $\kappa = 35.67$ );

**Table S2** Molar absorption coefficients of the dibenzalacetone derivatives (DBAd) in solvents employed, determined by linear regression.

| Solvent         | Molar absorption coefficients × 10 <sup>4</sup> L · mol <sup>-1</sup> · cm <sup>-1</sup> |          |          |          |
|-----------------|------------------------------------------------------------------------------------------|----------|----------|----------|
|                 | DBA                                                                                      | DBC      | DEP      | DMA      |
| Dichloromethane | 6.59 (1)                                                                                 | 3.27 (5) | 4.83 (7) | 4.63 (8) |
| Toluene         | 4.71 (3)                                                                                 | 3.24 (3) | 4.05 (4) | 4.09 (2) |
| Acetonitrile    | 7.44 (8)                                                                                 | 4.44 (3) | 5.96 (5) | 6.75 (4) |

<sup>a</sup>Toluene ( $\kappa = 2.37$ ); <sup>b</sup>Dichloromethane ( $\kappa = 8.93$ ); <sup>c</sup>Acetonitrile ( $\kappa = 35.67$ );

**Table S3** Optimized geometric parameters (bond length) for the two chalcone compounds: DBA (C<sub>17</sub>H<sub>14</sub>O), and DBC (C<sub>17</sub>H<sub>12</sub>Cl<sub>2</sub>O). The atom labels are presented in Fig.3

| DBA     |       |             |       | DBC     |       |             |       |
|---------|-------|-------------|-------|---------|-------|-------------|-------|
| Lig.    | Å     | Lig.        | °     | Lig.    | Å     | Lig.        | °     |
| C1-C2   | 1.399 | C2-C1-C3    | 118.7 | C1-C2   | 1.399 | C2-C1-C3    | 118.5 |
| C1-C3   | 1.402 | C2-C1-C7    | 118.4 | C1-C3   | 1.401 | C2-C1-C7    | 118.5 |
| C1-C7   | 1.469 | C1-C2-C4    | 120.9 | C1-C7   | 1.469 | C1-C2-C4    | 121.3 |
| C2-C4   | 1.391 | C1-C2-H     | 119.2 | C2-C4   | 1.389 | C1-C2-H     | 119.5 |
| C2-H    | 1.085 | C3-C1-C7    | 122.9 | C2-H    | 1.084 | C3-C1-C7    | 123.0 |
| C3-C5   | 1.387 | C1-C3-C5    | 120.4 | C3-C5   | 1.386 | C1-C3-C5    | 120.9 |
| C3-H    | 1.084 | C1-C3-H     | 120.3 | C3-H    | 1.083 | C1-C3-H     | 120.6 |
| C4-C6   | 1.391 | C1-C7-C8    | 126.4 | C4-C6   | 1.387 | C1-C7-C8    | 126.4 |
| C4-H    | 1.083 | C1-C7-H     | 114.9 | C4-H    | 1.082 | C1-C7-H     | 114.9 |
| C5-C6   | 1.395 | C4-C2-H     | 119.9 | C5-C6   | 1.391 | C4-C2-H     | 119.2 |
| C5-H    | 1.084 | C2-C4-C6    | 119.9 | C5-H    | 1.082 | C2-C4-C6    | 118.7 |
| C6-H    | 1.084 | C2-C4-H     | 119.9 | C6-C11  | 1.745 | C2-C4-H     | 120.9 |
| C7-C8   | 1.340 | C5-C3-H     | 119.3 | C7-C8   | 1.339 | C5-C3-H     | 118.6 |
| C7-H    | 1.087 | C3-C5-C6    | 120.3 | C7-H    | 1.087 | C3-C5-C6    | 119.1 |
| C8-C9   | 1.482 | C3-C5-H     | 119.7 | C8-C9   | 1.482 | C3-C5-H     | 120.7 |
| C8-H    | 1.085 | C6-C4-H     | 120.2 | C8-H    | 1.085 | C6-C4-H     | 120.4 |
| C9-C10  | 1.482 | C4-C6-C5    | 119.8 | C9-C10  | 1.483 | C4-C6-C5    | 121.5 |
| C9-O1   | 1.222 | C4-C6-H     | 120.2 | C9-O1   | 1.222 | C4-C6-C11   | 119.4 |
| C10-C11 | 1.340 | C6-C5-H     | 120.0 | C10-C11 | 1.340 | C6-C5-H     | 120.1 |
| C10-H   | 1.085 | C5-C6-H     | 120.1 | C10-H   | 1.085 | C5-C6-C11   | 119.1 |
| C11-C12 | 1.469 | C8-C7-H     | 118.6 | C11-C12 | 1.469 | C8-C7-H     | 118.7 |
| C11-H   | 1.087 | C7-C8-C9    | 124.0 | C11-H   | 1.087 | C7-C8-C9    | 123.9 |
| C12-C15 | 1.402 | C7-C8-H     | 121.7 | C12-C15 | 1.401 | C7-C8-H     | 121.8 |
| C12-C17 | 1.399 | C9-C8-H     | 113.9 | C12-C17 | 1.399 | C9-C8-H     | 113.9 |
| C13-C14 | 1.395 | C8-C9-C10   | 121.4 | C13-C14 | 1.392 | C8-C9-C10   | 121.4 |
| C13-C15 | 1.387 | C8-C9-O1    | 119.3 | C13-C15 | 1.386 | C8-C9-O1    | 119.3 |
| C13-H   | 1.084 | C10-C9-O1   | 119.2 | C13-H   | 1.082 | C10-C9-O1   | 119.3 |
| C14-C16 | 1.391 | C9-C10-C11  | 124.1 | C14-C16 | 1.387 | C9-C10-C11  | 124.0 |
| C14-H   | 1.084 | C9-C10-H    | 113.8 | C14-C12 | 1.746 | C9-C10-H    | 113.8 |
| C15-H   | 1.084 | C11-C10-H   | 121.6 | C15-H   | 1.083 | C11-C10-H   | 121.8 |
| C16-C17 | 1.391 | C10-C11-C12 | 126.2 | C16-C17 | 1.389 | C10-C11-C12 | 126.3 |
| C16-H   | 1.083 | C10-C11-H   | 118.7 | C16-H   | 1.082 | C10-C11-H   | 118.8 |
| C17-H   | 1.085 | C12-C11-H   | 115.1 | C17-H   | 1.084 | C12-C11-H   | 114.9 |
|         |       | C11-C12-C15 | 122.7 |         |       | C11-C12-C15 | 123.0 |
|         |       | C11-C12-C17 | 118.6 |         |       | C11-C12-C17 | 118.5 |
|         |       | C15-C12-C17 | 118.7 |         |       | C15-C12-C17 | 118.5 |
|         |       | C12-C15-C13 | 120.5 |         |       | C12-C15-C13 | 120.9 |
|         |       | C12-C15-H   | 120.2 |         |       | C12-C15-H   | 120.5 |
|         |       | C12-C17-C16 | 120.8 |         |       | C12-C17-C16 | 121.3 |
|         |       | C12-C17-H   | 119.3 |         |       | C12-C17-H   | 119.5 |
|         |       | C14-C13-C15 | 120.3 |         |       | C14-C13-C15 | 119.1 |
|         |       | C14-C13-H   | 120.0 |         |       | C14-C13-H   | 120.1 |
|         |       | C13-C14-C16 | 119.8 |         |       | C13-C14-C16 | 121.5 |
|         |       | C13-C14-H   | 120.1 |         |       | C13-C14-C12 | 119.2 |
|         |       | C15-C13-H   | 119.7 |         |       | C15-C13-H   | 120.8 |
|         |       | C13-C15-H   | 119.3 |         |       | C13-C15-H   | 118.6 |
|         |       | C16-C14-H   | 120.2 |         |       | C16-C14-C12 | 119.4 |
|         |       | C14-C16-C17 | 119.9 |         |       | C14-C16-C17 | 118.7 |
|         |       | C14-C16-H   | 120.2 |         |       | C14-C16-H   | 120.4 |
|         |       | C17-C16-H   | 119.9 |         |       | C17-C16-H   | 120.9 |
|         |       | C16-C17-H   | 119.9 |         |       | C16-C17-H   | 119.3 |

<sup>a</sup>Toluene ( $\kappa = 2.37$ ); <sup>b</sup>Dichloromethane ( $\kappa = 8.93$ ); <sup>c</sup>Acetonitrile ( $\kappa = 35.67$ );

**Table S4** Optimized geometric parameters (bond length) for the two chalcone compounds: DEP ( $C_{21}H_{22}O_3$ ), and DMA ( $C_{21}H_{18}O$ ). The atom labels are presented in Fig. 3

| DEP     |       |             |       | DMA     |       |             |       |
|---------|-------|-------------|-------|---------|-------|-------------|-------|
| Lig.    | Å     | Lig.        | °     | Lig.    | Å     | Lig.        | °     |
| C1-C2   | 1.403 | C2-C1-C3    | 117.9 | C1-C2   | 1.402 | C2-C1-C3    | 118.5 |
| C1-C3   | 1.398 | C2-C1-C7    | 119.1 | C1-C3   | 1.400 | C2-C1-C19   | 122.8 |
| C1-C7   | 1.465 | C1-C2-C4    | 121.3 | C1-C19  | 1.468 | C1-C2-C4    | 120.6 |
| C2-C4   | 1.382 | C1-C2-H     | 119.3 | C2-C4   | 1.388 | C1-C2-H     | 120.2 |
| C2-H    | 1.085 | C3-C1-C7    | 122.9 | C2-H    | 1.084 | C3-C1-C19   | 118.8 |
| C3-C5   | 1.389 | C1-C3-C5    | 121.5 | C3-C5   | 1.391 | C1-C3-C5    | 120.9 |
| C3-H    | 1.084 | C1-C3-H     | 120.1 | C3-H    | 1.085 | C1-C3-H     | 119.2 |
| C4-C6   | 1.399 | C1-C7-C8    | 126.2 | C4-C6   | 1.395 | C1-C19-C18  | 126.2 |
| C4-H    | 1.083 | C1-C7-H     | 115.2 | C4-H    | 1.084 | C1-C19-H    | 115.2 |
| C5-C6   | 1.399 | C4-C2-H     | 119.4 | C5-C6   | 1.391 | C4-C2-H     | 119.2 |
| C5-H    | 1.081 | C2-C4-C6    | 120.0 | C5-H    | 1.084 | C2-C4-C6    | 120.3 |
| C6-O2   | 1.352 | C2-C4-H     | 121.2 | C6-H    | 1.084 | C2-C4-H     | 119.7 |
| C7-C8   | 1.342 | C5-C3-H     | 118.4 | C7-C8   | 1.343 | C5-C3-H     | 119.8 |
| C7-H    | 1.087 | C3-C5-C6    | 119.6 | C7-H    | 1.086 | C3-C5-C6    | 120.0 |
| C8-C9   | 1.480 | C3-C5-H     | 119.2 | C8-C9   | 1.481 | C3-C5-H     | 119.8 |
| C8-H    | 1.085 | C6-C4-H     | 118.8 | C8-H    | 1.086 | C6-C4-H     | 120.0 |
| C9-C10  | 1.480 | C4-C6-C5    | 119.6 | C9-C10  | 1.481 | C4-C6-C5    | 119.6 |
| C9-O1   | 1.225 | C4-C6-O2    | 116.1 | C9-O1   | 1.224 | C4-C6-H     | 120.1 |
| C10-C11 | 1.342 | C6-C5-H     | 121.2 | C10-C11 | 1.343 | C6-C5-H     | 120.2 |
| C10-H   | 1.086 | C5-C6-O2    | 124.3 | C10-H   | 1.086 | C5-C6-H     | 120.2 |
| C11-C12 | 1.465 | C6-O2-C18   | 118.4 | C21-C12 | 1.469 | C18-C19-H   | 118.6 |
| C11-H   | 1.087 | O2-C18-C19  | 107.4 | C11-H   | 1.086 | C19-C18-C7  | 124.0 |
| C12-C15 | 1.398 | O2-C18-H    | 109.3 | C12-C15 | 1.400 | C19-C18-H   | 120.1 |
| C12-C17 | 1.404 | O2-C18-H    | 109.3 | C12-C17 | 1.402 | C7-C18-H    | 115.8 |
| C13-C14 | 1.399 | C19-C18-H   | 111.1 | C13-C14 | 1.391 | C18-C7-C8   | 125.3 |
| C13-C15 | 1.389 | C19-C18-H   | 111.1 | C13-C15 | 1.391 | C18-C7-H    | 115.8 |
| C13-H   | 1.081 | C18-C19-H   | 110.5 | C13-H   | 1.084 | C8-C7-H     | 118.8 |
| C14-C16 | 1.399 | C18-C19-H   | 110.5 | C14-C16 | 1.394 | C7-C8-C9    | 124.4 |
| C14-O3  | 1.352 | C18-C19-H   | 110.5 | C14-H   | 1.083 | C7-C8-H     | 120.9 |
| C15-H   | 1.084 | H-C18-H     | 108.6 | C15-H   | 1.085 | C9-C8-H     | 114.3 |
| C16-C17 | 1.382 | H-C19-H     | 108.9 | C16-C17 | 1.388 | C8-C9-C10   | 121.3 |
| C16-H   | 1.083 | H-C19-H     | 108.9 | C16-H   | 1.084 | C8-C9-O1    | 119.4 |
| C17-H   | 1.085 | H-C19-H     | 108.9 | C17-H   | 1.084 | C10-C9-O1   | 119.3 |
| O2-C18  | 1.428 | C8-C7-H     | 118.6 | C21-C12 | 1.469 | C9-C10-C11  | 124.4 |
| C18-C19 | 1.512 | C7-C8-C9    | 124.1 | C19-C18 | 1.342 | C9-C10-H    | 114.2 |
| C20-C21 | 1.512 | C7-C8-H     | 121.3 | C20-C21 | 1.342 | C11-C10-H   | 120.9 |
| C18-H   | 1.095 | C9-C8-H     | 114.1 | C18-H   | 1.086 | C10-C11-C20 | 125.5 |
| C18-H   | 1.095 | C8-C9-C10   | 121.4 |         |       | C10-C11-H   | 118.8 |
| C19-H   | 1.091 | C8-C9-O1    | 119.3 | C19-H   | 1.088 | C20-C11-H   | 115.7 |
| C19-H   | 1.091 | C10-C9-O1   | 119.3 |         |       | C11-C20-C21 | 124.2 |
| C19-H   | 1.091 | C9-C10-C11  | 124.2 |         |       | C11-C20-H   | 115.6 |
| O3-C20  | 1.428 | C9-C10-H    | 113.9 | C18-C7  | 1.461 | C21-C20-H   | 120.1 |
| C20-C21 | 1.512 | C11-C10-H   | 121.4 | C11-C20 | 1.461 | C20-C21-C12 | 126.4 |
| C20-H   | 1.095 | C10-C11-C12 | 126.5 | C20-H   | 1.085 | C20-C21-H   | 118.6 |
| C20-H   | 1.095 | C10-C11-H   | 118.5 |         |       | C12-C21-H   | 115.0 |
| C21-H   | 1.091 | C12-C11-H   | 114.9 |         |       | C21-C12-C15 | 118.6 |
| C21-H   | 1.091 | C11-C12-C15 | 123.3 | C21-H   | 1.088 | C21-C12-C17 | 122.9 |
| C21-H   | 1.091 | C11-C12-C17 | 118.8 |         |       | C15-C12-C17 | 118.4 |
|         |       | C15-C12-C17 | 117.9 |         |       | C12-C15-C13 | 121.0 |
|         |       | C12-C15-C13 | 121.5 |         |       | C12-C15-H   | 119.2 |
|         |       | C12-C15-H   | 120.2 |         |       | C12-C17-C16 | 120.6 |
|         |       | C12-C17-C16 | 121.4 |         |       | C12-C17-H   | 120.2 |
|         |       | C12-C17-H   | 119.2 |         |       | C14-C13-C15 | 120.0 |
|         |       | C14-C13-C15 | 119.6 |         |       | C14-C13-H   | 120.1 |
|         |       | C14-C13-H   | 121.1 |         |       | C13-C14-C16 | 119.7 |
|         |       | C13-C14-C16 | 119.6 |         |       | C13-C14-H   | 120.2 |
|         |       | C13-C14-O3  | 124.3 |         |       | C15-C13-H   | 119.9 |
|         |       | C15-C13-H   | 119.2 |         |       | C13-C15-H   | 119.8 |
|         |       | C13-C15-H   | 118.3 |         |       | C16-C14-H   | 120.1 |
|         |       | C16-C14-O3  | 116.1 |         |       | C14-C16-C17 | 120.4 |
|         |       | C14-C16-C17 | 120   |         |       | C14-C16-H   | 120.0 |
|         |       | C14-C16-H   | 118.8 |         |       | C17-C16-H   | 119.7 |
|         |       | C14-O3-C20  | 118.5 |         |       | C16-C17-H   | 119.2 |
|         |       | C17-C16-H   | 121.3 |         |       |             |       |
|         |       | C16-C17-H   | 119.4 |         |       |             |       |
|         |       | O3-C20-C21  | 107.5 |         |       |             |       |
|         |       | O3-C20-H    | 109.2 |         |       |             |       |
|         |       | O3-C20-H    | 109.2 |         |       |             |       |
|         |       | C21-C20-H   | 111.0 |         |       |             |       |
|         |       | C21-C20-H   | 111.0 |         |       |             |       |
|         |       | C20-C21-H   | 110.8 |         |       |             |       |
|         |       | C20-C21-H   | 110.8 |         |       |             |       |
|         |       | H-C20-H     | 108.5 |         |       |             |       |
|         |       | H-C21-H     | 108.8 |         |       |             |       |
|         |       | H-C21-H     | 108.8 |         |       |             |       |
|         |       | H-C21-H     | 108.8 |         |       |             |       |

<sup>a</sup>Toluene ( $\kappa = 2.37$ ); <sup>b</sup>Dichloromethane ( $\kappa = 8.93$ ); <sup>c</sup>Acetonitrile ( $\kappa = 35.67$ );

**Table S5** Calculated global reactivity descriptors for the dibenzalacetone derivatives (DBAd): DBA (C<sub>17</sub>H<sub>14</sub>O), DBC (C<sub>17</sub>H<sub>12</sub>Cl<sub>2</sub>O), DEP (C<sub>21</sub>H<sub>22</sub>O<sub>3</sub>), and DMA (C<sub>21</sub>H<sub>18</sub>O) in toluene ( $\kappa_{\text{TOL}} = 2.37$ ), dichloromethane ( $\kappa_{\text{DCM}} = 8.93$ ) and acetonitrile ( $\kappa_{\text{ACN}} = 35.67$ ).

| Descriptor                        | DBA    |        |        | DBC    |        |        |
|-----------------------------------|--------|--------|--------|--------|--------|--------|
|                                   | TOL    | DCM    | ACN    | TOL    | DCM    | ACN    |
| <b>E<sub>HOMO</sub></b>           | -7.999 | -8.011 | -8.017 | -8.020 | -7.989 | -7.981 |
| <b>E<sub>LUMO</sub></b>           | -1.522 | -1.595 | -1.622 | -1.710 | -1.718 | -1.724 |
| <sup>a</sup> <b>IP</b>            | 7.999  | 8.011  | 8.017  | 8.020  | 7.989  | 7.981  |
| <sup>b</sup> <b>EA</b>            | 1.522  | 1.595  | 1.622  | 1.710  | 1.718  | 1.724  |
| <sup>c</sup> <b>E<sub>F</sub></b> | 6.477  | 6.416  | 6.395  | 6.310  | 6.271  | 6.257  |
| <sup>d</sup> <b>E<sub>B</sub></b> | 2.865  | 2.734  | 2.687  | 2.708  | 2.601  | 2.563  |
| <sup>e</sup> $\chi$               | 4.761  | 4.803  | 4.819  | 4.865  | 4.854  | 4.852  |
| <sup>f</sup> $\eta$               | 3.238  | 3.208  | 3.198  | 3.155  | 3.135  | 3.129  |
| <sup>g</sup> <b>S</b>             | 0.309  | 0.312  | 0.313  | 0.317  | 0.319  | 0.320  |
| <sup>h</sup> $\mu$                | -4.761 | -4.803 | -4.819 | -4.865 | -4.854 | -4.852 |
| <sup>i</sup> $\omega$             | 36.702 | 37.000 | 37.136 | 37.330 | 36.936 | 36.831 |

  

| Descriptor                        | DEP    |        |        | DMA    |        |        |
|-----------------------------------|--------|--------|--------|--------|--------|--------|
|                                   | TOL    | DCM    | ACN    | TOL    | DCM    | ACN    |
| <b>E<sub>HOMO</sub></b>           | -7.367 | -7.396 | -7.434 | -7.544 | -7.553 | -7.541 |
| <b>E<sub>LUMO</sub></b>           | -1.292 | -1.415 | -1.458 | -1.728 | -1.795 | -1.834 |
| <sup>a</sup> <b>IP</b>            | 7.367  | 7.396  | 7.434  | 7.544  | 7.553  | 7.541  |
| <sup>b</sup> <b>EA</b>            | 1.292  | 1.415  | 1.458  | 1.728  | 1.795  | 1.834  |
| <sup>c</sup> <b>E<sub>F</sub></b> | 6.075  | 5.981  | 5.976  | 5.817  | 5.758  | 5.707  |
| <sup>d</sup> <b>E<sub>B</sub></b> | 2.407  | 2.243  | 2.214  | 2.287  | 2.149  | 2.072  |
| <sup>e</sup> $\chi$               | 4.329  | 4.406  | 4.446  | 4.636  | 4.674  | 4.687  |
| <sup>f</sup> $\eta$               | 3.037  | 2.991  | 2.988  | 2.908  | 2.879  | 2.854  |
| <sup>g</sup> <b>S</b>             | 0.329  | 0.334  | 0.335  | 0.344  | 0.347  | 0.350  |
| <sup>h</sup> $\mu$                | -4.329 | -4.406 | -4.446 | -4.636 | -4.674 | -4.687 |
| <sup>i</sup> $\omega$             | 28.465 | 29.022 | 29.532 | 31.251 | 31.453 | 31.344 |

<sup>a</sup>Ionization Potential (**IP**); <sup>b</sup>Electron Affinity (**EA**); <sup>c</sup>Fundamental Gap Energy (**E<sub>F</sub>**); <sup>d</sup>Binding Energy of the Electron-Hole Pair (**E<sub>B</sub>**); <sup>e</sup>Electronegativity ( $\chi$ ); <sup>f</sup>Chemical Hardness ( $\eta$ ); <sup>g</sup>Chemical Softness (**S**); <sup>h</sup>Electronic Chemical Potential ( $\mu$ ); <sup>i</sup>Electrophilicity Index ( $\omega$ );

**Table S6** Excited states, energies (E in eV), oscillator strengths (O Str), vertical transition and propability (%) of DBA chalcone TD-DFT calculated at M06-2X/6-311G(d,p) level in toluene ( $\kappa_{\text{TOL}} = 2.37$ ), dichloromethane ( $\kappa_{\text{DCM}} = 8.93$ ) and acetonitrile ( $\kappa_{\text{ACN}} = 35.67$ ).

| Excited State | Toluene ( $\kappa_{\text{TOL}} = 2.37$ ) |                    |                        |                  | dichloromethane ( $\kappa_{\text{DCM}} = 8.93$ ) |                    |                        |                  | Acetonitrile ( $\kappa_{\text{ACN}} = 35.67$ ) |                        |                        |                  |
|---------------|------------------------------------------|--------------------|------------------------|------------------|--------------------------------------------------|--------------------|------------------------|------------------|------------------------------------------------|------------------------|------------------------|------------------|
|               | E eV                                     | <sup>c</sup> O Str | Electronic Transition  | <sup>d</sup> (%) | E eV                                             | <sup>c</sup> O Str | Electronic Transition  | <sup>d</sup> (%) | E eV                                           | <sup>c</sup> O Str     | Electronic Transition  | <sup>d</sup> (%) |
| 1             | 3.61                                     | 0.006              | H-4 $\rightarrow$ L    | 76.3             | 3.68                                             | 0.007              | H-4 $\rightarrow$ L    | 77.1             | 3.71                                           | 0.007                  | H-4 $\rightarrow$ L    | 77.3             |
|               |                                          |                    | H-4 $\rightarrow$ L+9  | 5.6              |                                                  |                    | H-4 $\rightarrow$ L+9  | 5.8              |                                                |                        | H-4 $\rightarrow$ L+9  | 5.5              |
|               |                                          |                    | H-1 $\rightarrow$ L    | 3.9              |                                                  |                    | H-1 $\rightarrow$ L    | 4.0              |                                                |                        | H-1 $\rightarrow$ L    | 3.9              |
|               |                                          |                    | H-4 $\rightarrow$ L+12 | 3.7              |                                                  |                    | H-4 $\rightarrow$ L+12 | 2.4              |                                                |                        | H-4 $\rightarrow$ L+7  | 2.3              |
|               |                                          |                    |                        |                  |                                                  |                    |                        |                  |                                                | H-4 $\rightarrow$ L+12 | 2.2                    |                  |
| 2             | 4.27                                     | 0.839              | H $\rightarrow$ L      | 87.5             | 4.22                                             | 0.824              | H $\rightarrow$ L      | 88.8             | 4.21                                           | 0.810                  | H $\rightarrow$ L      | 89.3             |
|               |                                          |                    | H-1 $\rightarrow$ L+1  | 9.3              |                                                  |                    | H-1 $\rightarrow$ L+1  | 8.0              |                                                |                        | H-1 $\rightarrow$ L+1  | 7.4              |
| 3             | 4.60                                     | 0.490              | H-1 $\rightarrow$ L    | 87.2             | 4.57                                             | 0.474              | H-1 $\rightarrow$ L    | 88.1             | 4.58                                           | 0.454                  | H-1 $\rightarrow$ L    | 88.6             |
|               |                                          |                    | H $\rightarrow$ L+1    | 5.9              |                                                  |                    | H $\rightarrow$ L+1    | 4.9              |                                                |                        | H $\rightarrow$ L+1    | 4.3              |
|               |                                          |                    | H-4 $\rightarrow$ L    | 3.6              |                                                  |                    | H-4 $\rightarrow$ L    | 3.5              |                                                |                        | H-4 $\rightarrow$ L    | 3.4              |
| 4             | 4.98                                     | 0.014              | H-3 $\rightarrow$ L    | 27.5             | 4.96                                             | 0.019              | H-2 $\rightarrow$ L    | 32.9             | 4.95                                           | 0.019                  | H-3 $\rightarrow$ L    | 26.8             |
|               |                                          |                    | H-3 $\rightarrow$ L+1  | 20.9             |                                                  |                    | H-3 $\rightarrow$ L+1  | 19.7             |                                                |                        | H-2 $\rightarrow$ L    | 23.4             |
|               |                                          |                    | H-2 $\rightarrow$ L    | 18.0             |                                                  |                    | H-3 $\rightarrow$ L    | 16.1             |                                                |                        | H-3 $\rightarrow$ L+1  | 20.4             |
|               |                                          |                    | H-1 $\rightarrow$ L+4  | 9.4              |                                                  |                    | H $\rightarrow$ L+2    | 10.1             |                                                |                        | H $\rightarrow$ L+2    | 9.1              |
|               |                                          |                    | H $\rightarrow$ L+2    | 6.0              |                                                  |                    | H-1 $\rightarrow$ L+3  | 5.2              |                                                |                        | H-1 $\rightarrow$ L+3  | 8.6              |
|               |                                          |                    | H $\rightarrow$ L+2    | 4.0              |                                                  |                    | H-1 $\rightarrow$ L+4  | 4.9              |                                                |                        |                        |                  |
|               |                                          |                    | H $\rightarrow$ L+4    | 2.5              |                                                  |                    | H $\rightarrow$ L+1    | 2.2              |                                                |                        |                        |                  |
|               |                                          |                    | H $\rightarrow$ L+1    | 2.2              |                                                  |                    |                        |                  |                                                |                        |                        |                  |
|               |                                          |                    |                        |                  |                                                  |                    |                        |                  |                                                |                        |                        |                  |
| 5             | 4.98                                     | 0.011              | H-2 $\rightarrow$ L    | 27.4             | 4.96                                             | 0.012              | H-3 $\rightarrow$ L    | 33.1             | 4.95                                           | 0.013                  | H-2 $\rightarrow$ L    | 26.6             |
|               |                                          |                    | H-2 $\rightarrow$ L+1  | 21.1             |                                                  |                    | H-2 $\rightarrow$ L+1  | 20.0             |                                                |                        | H-3 $\rightarrow$ L    | 23.6             |
|               |                                          |                    | H-3 $\rightarrow$ L    | 18.0             |                                                  |                    | H-2 $\rightarrow$ L    | 16.0             |                                                |                        | H-2 $\rightarrow$ L+1  | 20.7             |
|               |                                          |                    | H $\rightarrow$ L+4    | 10.6             |                                                  |                    | H-1 $\rightarrow$ L+2  | 8.6              |                                                |                        | H $\rightarrow$ L+3    | 10.1             |
|               |                                          |                    | H-1 $\rightarrow$ L+3  | 5.4              |                                                  |                    | H $\rightarrow$ L+3    | 7.1              |                                                |                        | H-1 $\rightarrow$ L+2  | 7.6              |
|               |                                          |                    | H-1 $\rightarrow$ L+2  | 3.3              |                                                  |                    | H $\rightarrow$ L+4    | 4.5              |                                                |                        |                        |                  |
|               |                                          |                    | H-1 $\rightarrow$ L+4  | 2.3              |                                                  |                    |                        |                  |                                                |                        |                        |                  |
|               |                                          |                    | H-1 $\rightarrow$ L+1  | 2.2              |                                                  |                    |                        |                  |                                                |                        |                        |                  |
| 6             | 5.29                                     | 0.077              | H-1 $\rightarrow$ L+1  | 79.3             | 5.30                                             | 0.084              | H-1 $\rightarrow$ L+1  | 81.5             | 5.31                                           | 0.086                  | H-1 $\rightarrow$ L+1  | 81.5             |
|               |                                          |                    | H $\rightarrow$ L      | 6.8              |                                                  |                    | H $\rightarrow$ L      | 5.8              |                                                |                        | H $\rightarrow$ L      | 5.4              |
|               |                                          |                    | H-3 $\rightarrow$ L    | 3.1              |                                                  |                    | H-3 $\rightarrow$ L    | 2.7              |                                                |                        | H-3 $\rightarrow$ L    | 2.4              |
| 7             | 5.33                                     | 0.019              | H $\rightarrow$ L+1    | 81.6             | 5.31                                             | 0.024              | H $\rightarrow$ L+1    | 82.9             | 5.31                                           | 0.027                  | H $\rightarrow$ L+1    | 82.9             |
|               |                                          |                    | H-1 $\rightarrow$ L    | 4.4              |                                                  |                    | H-1 $\rightarrow$ L    | 3.6              |                                                |                        | H-1 $\rightarrow$ L    | 3.1              |
|               |                                          |                    | H-2 $\rightarrow$ L    | 3.4              |                                                  |                    | H-2 $\rightarrow$ L    | 3.2              |                                                |                        | H-2 $\rightarrow$ L    | 2.9              |
| 8             | 5.77                                     | 0.004              | H-4 $\rightarrow$ L+1  | 86.3             | 5.86                                             | 0.006              | H-4 $\rightarrow$ L+1  | 85.1             | 5.90                                           | 0.009                  | H-4 $\rightarrow$ L+1  | 82.8             |
|               |                                          |                    |                        |                  |                                                  |                    | H-4 $\rightarrow$ L+13 | 3.1              |                                                |                        | H-4 $\rightarrow$ L+13 | 3.1              |
|               |                                          |                    |                        |                  |                                                  |                    |                        |                  |                                                | H $\rightarrow$ L+3    | 2.2                    |                  |
| 9             | 5.96                                     | 0.145              | H $\rightarrow$ L+4    | 29.8             | 5.95                                             | 0.115              | H-1 $\rightarrow$ L+2  | 25.6             | 5.96                                           | 0.099                  | H $\rightarrow$ L+3    | 27.7             |
|               |                                          |                    | H-3 $\rightarrow$ L    | 24.6             |                                                  |                    | H-3 $\rightarrow$ L    | 25.1             |                                                |                        | H-1 $\rightarrow$ L+2  | 21.1             |
|               |                                          |                    | H-1 $\rightarrow$ L+3  | 17.9             |                                                  |                    | H $\rightarrow$ L+3    | 17.4             |                                                |                        | H-3 $\rightarrow$ L    | 23.9             |
|               |                                          |                    | H-1 $\rightarrow$ L+2  | 11.7             |                                                  |                    | H $\rightarrow$ L+4    | 11.9             |                                                |                        | H-2 $\rightarrow$ L    | 9.1              |
|               |                                          |                    | H-2 $\rightarrow$ L    | 8.9              |                                                  |                    | H-2 $\rightarrow$ L    | 8.2              |                                                |                        | H-4 $\rightarrow$ L+1  | 3.9              |
| 10            | 5.98                                     | 0.319              | H-2 $\rightarrow$ L    | 25.3             | 5.97                                             | 0.267              | H $\rightarrow$ L+2    | 30.5             | 5.97                                           | 0.236                  | H $\rightarrow$ L+2    | 30.9             |
|               |                                          |                    | H-1 $\rightarrow$ L+4  | 25.0             |                                                  |                    | H-2 $\rightarrow$ L    | 26.3             |                                                |                        | H-2 $\rightarrow$ L    | 25.9             |
|               |                                          |                    | H $\rightarrow$ L+3    | 19.2             |                                                  |                    | H-1 $\rightarrow$ L+3  | 12.7             |                                                |                        | H-1 $\rightarrow$ L+3  | 22.7             |
|               |                                          |                    | H $\rightarrow$ L+2    | 13.9             |                                                  |                    | H-1 $\rightarrow$ L+4  | 11.1             |                                                |                        | H-3 $\rightarrow$ L    | 9.2              |
|               |                                          |                    | H-3 $\rightarrow$ L    | 8.9              |                                                  |                    | H-3 $\rightarrow$ L    | 8.3              |                                                |                        | H $\rightarrow$ L+1    | 2.3              |
|               |                                          |                    | H $\rightarrow$ L+1    | 2.4              |                                                  |                    | H $\rightarrow$ L+1    | 2.3              |                                                |                        |                        |                  |
|               |                                          |                    |                        |                  |                                                  |                    |                        |                  |                                                |                        |                        |                  |

<sup>a</sup> $\kappa$ , is the dielectric constant for the solvent; <sup>b</sup>H=HOMO, L=LUMO. <sup>c</sup>O Str, oscillator strength; <sup>d</sup>Probability;

**Table S7** Excited states, energies (E in eV), oscillator strengths (O Str), vertical transition and propability (%) of DBC chalcone TD-DFT calculated at M06-2X/6-311G(d,p) level in toluene ( $\kappa_{\text{TOL}} = 2.37$ ), dichloromethane ( $\kappa_{\text{DCM}} = 8.93$ ) and acetonitrile ( $\kappa_{\text{ACN}} = 35.67$ ).

| Excited State | Toluene ( $\kappa_{\text{TOL}} = 2.37$ ) |                    |                        |                  | dichloromethane ( $\kappa_{\text{DCM}} = 8.93$ ) |                     |                        |                  | Acetonitrile ( $\kappa_{\text{ACN}} = 35.67$ ) |                       |                        |                  |
|---------------|------------------------------------------|--------------------|------------------------|------------------|--------------------------------------------------|---------------------|------------------------|------------------|------------------------------------------------|-----------------------|------------------------|------------------|
|               | E eV                                     | <sup>c</sup> O Str | Electronic Transition  | <sup>d</sup> (%) | E eV                                             | <sup>c</sup> O Str  | Electronic Transition  | <sup>d</sup> (%) | E eV                                           | <sup>c</sup> O Str    | Electronic Transition  | <sup>d</sup> (%) |
| 1             | 3.60                                     | 0.007              | H-4 $\rightarrow$ L    | 74.0             | 3.67                                             | 0.008               | H-4 $\rightarrow$ L    | 74.7             | 3.69                                           | 0.008                 | H-4 $\rightarrow$ L    | 74.8             |
|               |                                          |                    | H-4 $\rightarrow$ L+10 | 5.0              |                                                  |                     | H-4 $\rightarrow$ L+6  | 5.8              |                                                |                       | H-4 $\rightarrow$ L+6  | 6.2              |
|               |                                          |                    | H-4 $\rightarrow$ L+6  | 4.3              |                                                  |                     | H-1 $\rightarrow$ L    | 3.9              |                                                |                       | H-1 $\rightarrow$ L    | 3.9              |
|               |                                          |                    | H-1 $\rightarrow$ L    | 3.8              |                                                  |                     | H-4 $\rightarrow$ L+10 | 3.4              |                                                |                       | H-4 $\rightarrow$ L+10 | 2.9              |
|               |                                          |                    |                        |                  |                                                  |                     |                        |                  |                                                | H-5 $\rightarrow$ L   | 2.1                    |                  |
| 2             | 4.18                                     | 1.014              | H $\rightarrow$ L      | 85.0             | 4.14                                             | 0.992               | H $\rightarrow$ L      | 86.4             | 4.14                                           | 0.975                 | H $\rightarrow$ L      | 87.0             |
|               |                                          |                    | H-1 $\rightarrow$ L+1  | 10.9             |                                                  |                     | H-1 $\rightarrow$ L+1  | 9.4              |                                                |                       | H-1 $\rightarrow$ L+1  | 8.8              |
|               |                                          |                    | H-6 $\rightarrow$ L    | 2.5              |                                                  |                     | H-6 $\rightarrow$ L    | 2.6              |                                                |                       | H-6 $\rightarrow$ L    | 2.7              |
| 3             | 4.51                                     | 0.549              | H-1 $\rightarrow$ L    | 83.8             | 4.50                                             | 0.535               | H-1 $\rightarrow$ L    | 85.1             | 4.51                                           | 0.544                 | H-1 $\rightarrow$ L    | 85.8             |
|               |                                          |                    | H $\rightarrow$ L+1    | 8.8              |                                                  |                     | H $\rightarrow$ L+1    | 7.4              |                                                |                       | H $\rightarrow$ L+1    | 6.6              |
|               |                                          |                    | H-4 $\rightarrow$ L    | 3.0              |                                                  |                     | H-4 $\rightarrow$ L    | 3.0              |                                                |                       | H-4 $\rightarrow$ L    | 2.9              |
|               |                                          |                    |                        |                  |                                                  | H-5 $\rightarrow$ L | 2.0                    |                  |                                                | H-5 $\rightarrow$ L   | 2.1                    |                  |
| 4             | 4.96                                     | 0.000              | H-2 $\rightarrow$ L    | 19.4             | 4.95                                             | 0.002               | H-2 $\rightarrow$ L    | 26.3             | 4.95                                           | 0.003                 | H-2 $\rightarrow$ L    | 27.5             |
|               |                                          |                    | H-1 $\rightarrow$ L+3  | 18.4             |                                                  |                     | H $\rightarrow$ L+2    | 18.7             |                                                |                       | H $\rightarrow$ L+2    | 18.2             |
|               |                                          |                    | H $\rightarrow$ L+2    | 18.2             |                                                  |                     | H-1 $\rightarrow$ L+3  | 18.3             |                                                |                       | H-1 $\rightarrow$ L+3  | 17.8             |
|               |                                          |                    | H-3 $\rightarrow$ L+1  | 14.9             |                                                  |                     | H-3 $\rightarrow$ L+1  | 15.5             |                                                |                       | H-3 $\rightarrow$ L+1  | 15.7             |
|               |                                          |                    | H $\rightarrow$ L+1    | 8.6              |                                                  |                     | H $\rightarrow$ L+1    | 8.9              |                                                |                       | H $\rightarrow$ L+1    | 8.6              |
|               |                                          |                    | H-3 $\rightarrow$ L    | 7.4              |                                                  |                     | H-3 $\rightarrow$ L    | 3.4              |                                                |                       | H-3 $\rightarrow$ L    | 3.5              |
| 5             | 4.96                                     | 0.001              | H $\rightarrow$ L+3    | 21.1             | 4.96                                             | 0.002               | H-3 $\rightarrow$ L    | 26.8             | 4.96                                           | 0.002                 | H-3 $\rightarrow$ L    | 28.1             |
|               |                                          |                    | H-3 $\rightarrow$ L    | 19.3             |                                                  |                     | H $\rightarrow$ L+3    | 21.3             |                                                |                       | H $\rightarrow$ L+3    | 20.7             |
|               |                                          |                    | H-1 $\rightarrow$ L+2  | 16.1             |                                                  |                     | H-1 $\rightarrow$ L+2  | 16.5             |                                                |                       | H-2 $\rightarrow$ L+1  | 16.2             |
|               |                                          |                    | H-2 $\rightarrow$ L+1  | 15.1             |                                                  |                     | H-2 $\rightarrow$ L+1  | 15.9             |                                                |                       | H-1 $\rightarrow$ L+2  | 16.1             |
|               |                                          |                    | H-1 $\rightarrow$ L+1  | 8.7              |                                                  |                     | H-1 $\rightarrow$ L+1  | 7.8              |                                                |                       | H-1 $\rightarrow$ L+1  | 7.2              |
|               |                                          |                    | H-2 $\rightarrow$ L    | 7.3              |                                                  |                     | H-2 $\rightarrow$ L    | 3.5              |                                                |                       | H-2 $\rightarrow$ L    | 3.4              |
| 6             | 5.21                                     | 0.100              | H-1 $\rightarrow$ L+1  | 70.4             | 5.23                                             | 0.110               | H-1 $\rightarrow$ L+1  | 72.5             | 5.23                                           | 0.035                 | H $\rightarrow$ L+1    | 71.1             |
|               |                                          |                    | H $\rightarrow$ L      | 7.0              |                                                  |                     | H $\rightarrow$ L      | 6.1              |                                                |                       | H-2 $\rightarrow$ L    | 7.6              |
|               |                                          |                    | H-3 $\rightarrow$ L    | 6.1              |                                                  |                     | H-3 $\rightarrow$ L    | 5.7              |                                                |                       | H-1 $\rightarrow$ L1   | 3.6              |
|               |                                          |                    | H-2 $\rightarrow$ L+1  | 2.8              |                                                  |                     | H-2 $\rightarrow$ L+1  | 2.7              |                                                |                       | H-1 $\rightarrow$ L    | 3.6              |
|               |                                          |                    |                        |                  |                                                  |                     |                        |                  |                                                | H-3 $\rightarrow$ L+1 | 3.0                    |                  |
|               |                                          |                    |                        |                  |                                                  |                     |                        |                  |                                                | H-5 $\rightarrow$ L   | 2.2                    |                  |
| 7             | 5.24                                     | 0.026              | H $\rightarrow$ L+1    | 72.1             | 5.23                                             | 0.030               | H $\rightarrow$ L+1    | 72.7             | 5.85                                           | 0.039                 | H-1 $\rightarrow$ L+1  | 71.1             |
|               |                                          |                    | H-2 $\rightarrow$ L    | 6.8              |                                                  |                     | H-2 $\rightarrow$ L    | 6.9              |                                                |                       | H-3 $\rightarrow$ L    | 6.3              |
|               |                                          |                    | H-1 $\rightarrow$ L    | 5.1              |                                                  |                     | H-1 $\rightarrow$ L    | 4.2              |                                                |                       | H $\rightarrow$ L      | 5.4              |
|               |                                          |                    | H-3 $\rightarrow$ L+1  | 3.6              |                                                  |                     | H-3 $\rightarrow$ L+1  | 3.5              |                                                |                       | H $\rightarrow$ L+1    | 3.6              |
|               |                                          |                    | H-5 $\rightarrow$ L    | 2.4              |                                                  |                     | H-5 $\rightarrow$ L    | 2.3              |                                                |                       | H-2 $\rightarrow$ L+1  | 2.1              |
| 8             | 5.72                                     | 0.005              | H-4 $\rightarrow$ L+1  | 84.2             | 5.82                                             | 0.015               | H-4 $\rightarrow$ L+1  | 79.1             | 5.85                                           | 0.039                 | H-4 $\rightarrow$ L+1  | 63.5             |
|               |                                          |                    |                        |                  |                                                  |                     | H-3 $\rightarrow$ L    | 3.3              |                                                |                       | H-3 $\rightarrow$ L    | 10.8             |
|               |                                          |                    |                        |                  |                                                  |                     | H-4 $\rightarrow$ L+12 | 2.9              |                                                |                       | H $\rightarrow$ L+3    | 7.8              |
|               |                                          |                    |                        |                  |                                                  |                     | H $\rightarrow$ L+3    | 2.4              |                                                |                       | H-1 $\rightarrow$ L+2  | 5.9              |
|               |                                          |                    |                        |                  |                                                  |                     |                        |                  |                                                | H-4 $\rightarrow$ L+2 | 2.7                    |                  |
| 9             | 5.86                                     | 0.146              | H-3 $\rightarrow$ L    | 38.2             | 5.87                                             | 0.121               | H-3 $\rightarrow$ L    | 35.7             | 5.88                                           | 0.088                 | H-3 $\rightarrow$ L    | 28.8             |
|               |                                          |                    | H $\rightarrow$ L+3    | 24.8             |                                                  |                     | H $\rightarrow$ L+3    | 24.7             |                                                |                       | H-4 $\rightarrow$ L+1  | 22.0             |
|               |                                          |                    | H-1 $\rightarrow$ L+2  | 24.6             |                                                  |                     | H-1 $\rightarrow$ L+2  | 23.5             |                                                |                       | H $\rightarrow$ L+3    | 19.8             |
|               |                                          |                    | H-2 $\rightarrow$ L+1  | 4.9              |                                                  |                     | H-4 $\rightarrow$ L+1  | 6.6              |                                                |                       | H-1 $\rightarrow$ L+2  | 19.1             |
|               |                                          |                    | H-2 $\rightarrow$ L    | 3.0              |                                                  |                     | H-2 $\rightarrow$ L+1  | 2.6              |                                                |                       |                        |                  |
|               |                                          |                    |                        |                  |                                                  | H-2 $\rightarrow$ L | 2.1                    |                  |                                                |                       |                        |                  |
| 10            | 5.88                                     | 0.390              | H-2 $\rightarrow$ L    | 38.0             | 5.88                                             | 0.359               | H-2 $\rightarrow$ L    | 38.6             | 5.90                                           | 0.333                 | H-2 $\rightarrow$ L    | 39.3             |
|               |                                          |                    | H $\rightarrow$ L+2    | 28.6             |                                                  |                     | H $\rightarrow$ L+2    | 30.1             |                                                |                       | H $\rightarrow$ L+2    | 30.3             |
|               |                                          |                    | H-1 $\rightarrow$ L+3  | 21.1             |                                                  |                     | H-1 $\rightarrow$ L+3  | 21.7             |                                                |                       | H-1 $\rightarrow$ L+3  | 21.4             |
|               |                                          |                    | H-3 $\rightarrow$ L+1  | 4.5              |                                                  |                     | H-3 $\rightarrow$ L+1  | 2.7              |                                                |                       |                        |                  |
|               |                                          |                    | H-3 $\rightarrow$ L    | 2.9              |                                                  |                     | H-3 $\rightarrow$ L    | 2.2              |                                                |                       |                        |                  |

<sup>a</sup> $\kappa$ , is the dielectric constant for the solvent; <sup>b</sup>H=HOMO, L=LUMO. <sup>c</sup>O Str, oscillator strength; <sup>d</sup>Probability;

**Table S8** Excited states, energies (E in eV), oscillator strengths (O Str), vertical transition and propability (%) of DEP chalcone TD-DFT calculated at M06-2X/6-311G(d,p) level in toluene ( $\kappa_{\text{TOL}} = 2.37$ ), dichloromethane ( $\kappa_{\text{DCM}} = 8.93$ ) and acetonitrile ( $\kappa_{\text{ACN}} = 35.67$ ).

| Excited State          | Toluene ( $\kappa_{\text{TOL}} = 2.37$ ) |                        |                        |         | dichloromethane ( $\kappa_{\text{DCM}} = 8.93$ ) |                        |                        |         | Acetonitrile ( $\kappa_{\text{ACN}} = 35.67$ ) |                        |                        |         |  |
|------------------------|------------------------------------------|------------------------|------------------------|---------|--------------------------------------------------|------------------------|------------------------|---------|------------------------------------------------|------------------------|------------------------|---------|--|
|                        | E eV                                     | $^{\circ}\text{O Str}$ | Electronic Transition  | $d(\%)$ | E eV                                             | $^{\circ}\text{O Str}$ | Electronic Transition  | $d(\%)$ | E eV                                           | $^{\circ}\text{O Str}$ | Electronic Transition  | $d(\%)$ |  |
| 1                      | 3.67                                     | 0.011                  | H-4 $\rightarrow$ L    | 72.7    | 3.74                                             | 0.016                  | H-4 $\rightarrow$ L    | 73.5    | 3.76                                           | 0.011                  | H-4 $\rightarrow$ L    | 74.0    |  |
|                        |                                          |                        | H-1 $\rightarrow$ L    | 3.6     |                                                  |                        | H-1 $\rightarrow$ L    | 5.3     |                                                |                        | H-5 $\rightarrow$ L    | 5.1     |  |
|                        |                                          |                        | H-4 $\rightarrow$ L+16 | 3.52    |                                                  |                        | H-5 $\rightarrow$ L    | 3.7     |                                                |                        | H-1 $\rightarrow$ L    | 3.5     |  |
|                        |                                          |                        | H-5 $\rightarrow$ L    | 2.7     |                                                  |                        | H-4 $\rightarrow$ L+19 | 3.3     |                                                |                        | H-4 $\rightarrow$ L+19 | 2.4     |  |
|                        |                                          |                        | H-2 $\rightarrow$ L    | 2.6     |                                                  |                        |                        |         |                                                |                        |                        |         |  |
| H-4 $\rightarrow$ L+19 | 2.3                                      |                        |                        |         |                                                  |                        |                        |         |                                                |                        |                        |         |  |
| 2                      | 3.97                                     | 1.065                  | H $\rightarrow$ L      | 85.5    | 3.90                                             | 1.053                  | H $\rightarrow$ L      | 87.2    | 3.91                                           | 1.048                  | H $\rightarrow$ L      | 87.2    |  |
|                        |                                          |                        | H-1 $\rightarrow$ L+1  | 10.5    |                                                  |                        | H-1 $\rightarrow$ L+1  | 8.9     |                                                |                        | H-1 $\rightarrow$ L+1  | 8.6     |  |
|                        |                                          |                        | H-6 $\rightarrow$ L    | 2.3     |                                                  |                        | H-6 $\rightarrow$ L    | 2.4     |                                                |                        | H-6 $\rightarrow$ L    | 2.5     |  |
| 3                      | 4.32                                     | 0.451                  | H-1 $\rightarrow$ L    | 82.7    | 4.30                                             | 0.449                  | H-1 $\rightarrow$ L    | 82.0    | 4.28                                           | 0.424                  | H-1 $\rightarrow$ L    | 85.5    |  |
|                        |                                          |                        | H $\rightarrow$ L+1    | 10.4    |                                                  |                        | H $\rightarrow$ L+1    | 9.5     |                                                |                        | H $\rightarrow$ L+1    | 7.5     |  |
|                        |                                          |                        | H-4 $\rightarrow$ L    | 2.6     |                                                  |                        | H-4 $\rightarrow$ L    | 3.6     |                                                |                        | H-5 $\rightarrow$ L    | 2.3     |  |
|                        |                                          |                        |                        |         |                                                  | H-5 $\rightarrow$ L    | 2.2                    |         |                                                | H-4 $\rightarrow$ L    | 2.2                    |         |  |
| 4                      | 4.85                                     | 0.013                  | H $\rightarrow$ L+1    | 23.7    | 4.83                                             | 0.005                  | H $\rightarrow$ L+1    | 35.5    | 4.85                                           | 0.002                  | H $\rightarrow$ L+1    | 30.7    |  |
|                        |                                          |                        | H-1 $\rightarrow$ L+3  | 14.4    |                                                  |                        | H-1 $\rightarrow$ L+2  | 20.6    |                                                |                        | H-1 $\rightarrow$ L+2  | 22.1    |  |
|                        |                                          |                        | H $\rightarrow$ L+4    | 13.7    |                                                  |                        | H-2 $\rightarrow$ L    | 9.0     |                                                |                        | H $\rightarrow$ L+3    | 14.7    |  |
|                        |                                          |                        | H-3 $\rightarrow$ L    | 8.8     |                                                  |                        | H $\rightarrow$ L+3    | 8.2     |                                                |                        | H-2 $\rightarrow$ L    | 6.9     |  |
|                        |                                          |                        | H-3 $\rightarrow$ L+1  | 6.3     |                                                  |                        | H $\rightarrow$ L+4    | 7.6     |                                                |                        | H-3 $\rightarrow$ L    | 5.7     |  |
|                        |                                          |                        | H-1 $\rightarrow$ L+1  | 5.5     |                                                  |                        | H-3 $\rightarrow$ L+1  | 5.6     |                                                |                        | H-3 $\rightarrow$ L+1  | 5.1     |  |
|                        |                                          |                        | H-1 $\rightarrow$ L+4  | 4.6     |                                                  |                        | H-1 $\rightarrow$ L    | 5.4     |                                                |                        | H-1 $\rightarrow$ L    | 3.8     |  |
|                        |                                          |                        | H $\rightarrow$ L+2    | 4.2     |                                                  |                        |                        |         |                                                |                        | H $\rightarrow$ L+4    | 2.6     |  |
|                        |                                          |                        | H-1 $\rightarrow$ L    | 4.2     |                                                  |                        |                        |         |                                                |                        |                        |         |  |
|                        |                                          |                        | H $\rightarrow$ L+3    | 3.4     |                                                  |                        |                        |         |                                                |                        |                        |         |  |
|                        |                                          |                        |                        |         |                                                  |                        |                        |         |                                                |                        |                        |         |  |
| 5                      | 4.86                                     | 0.015                  | H $\rightarrow$ L+3    | 24.6    | 4.85                                             | 0.018                  | H $\rightarrow$ L+2    | 27.7    | 4.86                                           | 0.017                  | H $\rightarrow$ L+2    | 27.2    |  |
|                        |                                          |                        | H-1 $\rightarrow$ L+1  | 20.6    |                                                  |                        | H-1 $\rightarrow$ L+1  | 27.3    |                                                |                        | H-1 $\rightarrow$ L+1  | 24.2    |  |
|                        |                                          |                        | H-1 $\rightarrow$ L+3  | 9.4     |                                                  |                        | H-3 $\rightarrow$ L    | 11.1    |                                                |                        | H-1 $\rightarrow$ L+3  | 14.9    |  |
|                        |                                          |                        | H-1 $\rightarrow$ L+4  | 9.3     |                                                  |                        | H-1 $\rightarrow$ L+3  | 8.6     |                                                |                        | H-3 $\rightarrow$ L    | 9.1     |  |
|                        |                                          |                        | H-2 $\rightarrow$ L    | 7.7     |                                                  |                        | H-1 $\rightarrow$ L+4  | 7.5     |                                                |                        | H-2 $\rightarrow$ L+1  | 5.9     |  |
|                        |                                          |                        | H-2 $\rightarrow$ L+1  | 6.9     |                                                  |                        | H-2 $\rightarrow$ L+1  | 6.7     |                                                |                        | H-2 $\rightarrow$ L    | 5.0     |  |
|                        |                                          |                        | H $\rightarrow$ L+1    | 5.6     |                                                  |                        | H $\rightarrow$ L      | 2.7     |                                                |                        | H $\rightarrow$ L      | 2.4     |  |
|                        |                                          |                        | H-3 $\rightarrow$ L    | 2.6     |                                                  |                        |                        |         |                                                |                        | H-1 $\rightarrow$ L+4  | 2.3     |  |
|                        |                                          |                        | H $\rightarrow$ L      | 2.5     |                                                  |                        |                        |         |                                                |                        |                        |         |  |
|                        |                                          |                        |                        |         |                                                  |                        |                        |         |                                                |                        |                        |         |  |
| 6                      | 5.12                                     | 0.073                  | H-1 $\rightarrow$ L+1  | 30.1    | 5.09                                             | 0.038                  | H $\rightarrow$ L+1    | 46.3    | 5.11                                           | 0.055                  | H $\rightarrow$ L+1    | 41.2    |  |
|                        |                                          |                        | H $\rightarrow$ L+1    | 23.5    |                                                  |                        | H-2 $\rightarrow$ L    | 14.6    |                                                |                        | H-2 $\rightarrow$ L    | 13.3    |  |
|                        |                                          |                        | H-2 $\rightarrow$ L    | 9.7     |                                                  |                        | H $\rightarrow$ L+3    | 7.4     |                                                |                        | H-1 $\rightarrow$ L+1  | 11.4    |  |
|                        |                                          |                        | H-2 $\rightarrow$ L+1  | 4.0     |                                                  |                        | H $\rightarrow$ L+4    | 6.3     |                                                |                        | H $\rightarrow$ L+3    | 8.5     |  |
|                        |                                          |                        | H-1 $\rightarrow$ L+4  | 3.9     |                                                  |                        | H-3 $\rightarrow$ L+1  | 6.0     |                                                |                        | H-2 $\rightarrow$ L+1  | 4.2     |  |
|                        |                                          |                        | H $\rightarrow$ L+3    | 3.9     |                                                  |                        | H-1 $\rightarrow$ L+2  | 5.3     |                                                |                        | H-1 $\rightarrow$ L+2  | 2.9     |  |
|                        |                                          |                        | H $\rightarrow$ L+4    | 3.8     |                                                  |                        | H-1 $\rightarrow$ L    | 2.8     |                                                |                        | H-1 $\rightarrow$ L+3  | 2.2     |  |
|                        |                                          |                        | H-1 $\rightarrow$ L+3  | 3.8     |                                                  |                        |                        |         |                                                |                        | H-1 $\rightarrow$ L    | 2.0     |  |
|                        |                                          |                        | H $\rightarrow$ L      | 2.9     |                                                  |                        |                        |         |                                                |                        |                        |         |  |
|                        |                                          |                        | H-1 $\rightarrow$ L    | 2.0     |                                                  |                        |                        |         |                                                |                        |                        |         |  |
|                        |                                          |                        |                        |         |                                                  |                        |                        |         |                                                |                        |                        |         |  |
| 7                      | 5.13                                     | 0.056                  | H $\rightarrow$ L+1    | 28.2    | 5.12                                             | 0.096                  | H-1 $\rightarrow$ L+1  | 55.2    | 5.13                                           | 0.075                  | H-1 $\rightarrow$ L+1  | 47.1    |  |
|                        |                                          |                        | H-1 $\rightarrow$ L+1  | 25.1    |                                                  |                        | H-3 $\rightarrow$ L    | 11.4    |                                                |                        | H-3 $\rightarrow$ L    | 12.9    |  |
|                        |                                          |                        | H-3 $\rightarrow$ L    | 11.3    |                                                  |                        | H-1 $\rightarrow$ L+3  | 4.8     |                                                |                        | H $\rightarrow$ L+1    | 11.2    |  |
|                        |                                          |                        | H $\rightarrow$ L+4    | 6.4     |                                                  |                        | H-1 $\rightarrow$ L+4  | 4.6     |                                                |                        | H-1 $\rightarrow$ L+3  | 5.0     |  |
|                        |                                          |                        | H-1 $\rightarrow$ L+4  | 4.6     |                                                  |                        | H $\rightarrow$ L+2    | 4.5     |                                                |                        | H-3 $\rightarrow$ L+1  | 3.4     |  |
|                        |                                          |                        | H-3 $\rightarrow$ L+1  | 4.5     |                                                  |                        | H $\rightarrow$ L      | 4.3     |                                                |                        | H $\rightarrow$ L      | 3.3     |  |
|                        |                                          |                        | H $\rightarrow$ L      | 2.3     |                                                  |                        | H-2 $\rightarrow$ L+1  | 4.0     |                                                |                        | H $\rightarrow$ L+2    | 2.7     |  |
|                        |                                          |                        |                        |         |                                                  |                        |                        |         |                                                |                        |                        |         |  |
| 8                      | 5.75                                     | 0.006                  | H $\rightarrow$ L+2    | 54.7    | 5.74                                             | 0.136                  | H-3 $\rightarrow$ L    | 47.2    | 5.74                                           | 0.180                  | H-3 $\rightarrow$ L    | 37.1    |  |
|                        |                                          |                        | H-1 $\rightarrow$ L+5  | 15.5    |                                                  |                        | H $\rightarrow$ L+2    | 20.7    |                                                |                        | H $\rightarrow$ L+2    | 20.8    |  |
|                        |                                          |                        | H $\rightarrow$ L+4    | 7.0     |                                                  |                        | H-2 $\rightarrow$ L+1  | 8.3     |                                                |                        | H-2 $\rightarrow$ L    | 15.2    |  |
|                        |                                          |                        | H-3 $\rightarrow$ L    | 2.8     |                                                  |                        | H-1 $\rightarrow$ L+3  | 6.9     |                                                |                        | H-1 $\rightarrow$ L+3  | 11.9    |  |
|                        |                                          |                        | H-1 $\rightarrow$ L+4  | 2.8     |                                                  |                        | H-1 $\rightarrow$ L+4  | 6.7     |                                                |                        | H-2 $\rightarrow$ L+1  | 5.3     |  |
|                        |                                          |                        | H-1 $\rightarrow$ L+2  | 2.4     |                                                  |                        | H-2 $\rightarrow$ L    | 4.4     |                                                |                        | H-1 $\rightarrow$ L+4  | 3.2     |  |
|                        |                                          |                        | H-1 $\rightarrow$ L+9  | 2.2     |                                                  |                        |                        |         |                                                |                        | H-3 $\rightarrow$ L+1  | 2.3     |  |
|                        |                                          |                        |                        |         |                                                  |                        |                        |         |                                                |                        |                        |         |  |
| 9                      | 5.77                                     | 0.147                  | H-3 $\rightarrow$ L    | 28.0    | 5.78                                             | 0.269                  | H $\rightarrow$ L+3    | 38.6    | 5.77                                           | 0.380                  | H-2 $\rightarrow$ L    | 38.1    |  |
|                        |                                          |                        | H $\rightarrow$ L+3    | 15.3    |                                                  |                        | H-2 $\rightarrow$ L    | 31.8    |                                                |                        | H $\rightarrow$ L+3    | 19.0    |  |
|                        |                                          |                        | H-2 $\rightarrow$ L    | 13.5    |                                                  |                        | H-1 $\rightarrow$ L+2  | 8.0     |                                                |                        | H-1 $\rightarrow$ L+2  | 16.1    |  |
|                        |                                          |                        | H-2 $\rightarrow$ L+1  | 10.6    |                                                  |                        | H-1 $\rightarrow$ L+5  | 6.9     |                                                |                        | H-3 $\rightarrow$ L    | 14.8    |  |
|                        |                                          |                        | H-4 $\rightarrow$ L+1  | 9.8     |                                                  |                        | H-3 $\rightarrow$ L+1  | 3.9     |                                                |                        | H-3 $\rightarrow$ L+1  | 3.4     |  |
|                        |                                          |                        | H-1 $\rightarrow$ L+4  | 7.9     |                                                  |                        | H-3 $\rightarrow$ L    | 2.3     |                                                |                        | H $\rightarrow$ L+4    | 2.3     |  |
|                        |                                          |                        | H-3 $\rightarrow$ L+1  | 3.2     |                                                  |                        |                        |         |                                                |                        | H-2 $\rightarrow$ L+1  | 2.3     |  |
|                        |                                          |                        |                        |         |                                                  |                        |                        |         |                                                |                        |                        |         |  |
| 10                     | 5.78                                     | 0.032                  | H-1 $\rightarrow$ L+2  | 47.7    | 5.79                                             | 0.218                  | H $\rightarrow$ L+4    | 43.2    | 5.81                                           | 0.007                  | H $\rightarrow$ L+4    | 55.5    |  |
|                        |                                          |                        | H $\rightarrow$ L+5    | 24.2    |                                                  |                        | H-2 $\rightarrow$ L    | 16.7    |                                                |                        | H-1 $\rightarrow$ L+5  | 18.2    |  |
|                        |                                          |                        | H-1 $\rightarrow$ L+4  | 5.9     |                                                  |                        | H-1 $\rightarrow$ L+5  | 10.5    |                                                |                        | H $\rightarrow$ L+3    | 10.2    |  |
|                        |                                          |                        | H $\rightarrow$ L+2    | 3.1     |                                                  |                        | H-1 $\rightarrow$ L+2  | 8.0     |                                                |                        |                        |         |  |
|                        |                                          |                        | H $\rightarrow$ L+9    | 2.7     |                                                  |                        | H $\rightarrow$ L+3    | 7.1     |                                                |                        |                        |         |  |
|                        |                                          |                        | H-3 $\rightarrow$ L    | 2.1     |                                                  |                        | H-3 $\rightarrow$ L    | 2.4     |                                                |                        |                        |         |  |
|                        |                                          |                        |                        |         |                                                  |                        |                        |         |                                                |                        | H-3 $\rightarrow$ L+1  | 2.3     |  |

<sup>a</sup>  $\kappa$ , is the dielectric constant for the solvent; <sup>b</sup>H=HOMO, L=LUMO. <sup>c</sup>O Str, oscillator strength; <sup>d</sup>Probability;

**Table S9** Excited states, energies (E in eV), oscillator strengths (O Str), vertical transition and propability (%) of DMA chalcone TD-DFT calculated at M06-2X/6-311G(d,p) level in toluene ( $\kappa_{\text{TOL}} = 2.37$ ), dichloromethane ( $\kappa_{\text{DCM}} = 8.93$ ) and acetonitrile ( $\kappa_{\text{ACN}} = 35.67$ ).

| Excited State | Toluene ( $\kappa_{\text{TOL}} = 2.37$ ) |                        |                        |                     | dichloromethane ( $\kappa_{\text{DCM}} = 8.93$ ) |                        |                       |         | Acetonitrile ( $\kappa_{\text{ACN}} = 35.67$ ) |                        |                       |         |                     |     |  |  |  |
|---------------|------------------------------------------|------------------------|------------------------|---------------------|--------------------------------------------------|------------------------|-----------------------|---------|------------------------------------------------|------------------------|-----------------------|---------|---------------------|-----|--|--|--|
|               | E eV                                     | $^{\circ}\text{O Str}$ | Electronic Transition  | $d(\%)$             | E eV                                             | $^{\circ}\text{O Str}$ | Electronic Transition | $d(\%)$ | E eV                                           | $^{\circ}\text{O Str}$ | Electronic Transition | $d(\%)$ |                     |     |  |  |  |
| 1             | 3.53                                     | 0.002                  | H-4 $\rightarrow$ L    | 63.5                | 3.61                                             | 0.003                  | H-4 $\rightarrow$ L   | 57.4    | 3.64                                           | 0.034                  | H-4 $\rightarrow$ L   | 54.0    |                     |     |  |  |  |
|               |                                          |                        | H-5 $\rightarrow$ L    | 11.4                |                                                  |                        | H-6 $\rightarrow$ L   | 18.0    |                                                |                        | H-6 $\rightarrow$ L   | 19.6    |                     |     |  |  |  |
|               |                                          |                        | H-4 $\rightarrow$ L+2  | 7.6                 |                                                  |                        | H-4 $\rightarrow$ L+2 | 7.1     |                                                |                        | H-4 $\rightarrow$ L+2 | 6.8     |                     |     |  |  |  |
|               |                                          |                        | H-4 $\rightarrow$ L+5  | 2.2                 |                                                  |                        | H-6 $\rightarrow$ L+2 | 2.5     |                                                |                        | H-6 $\rightarrow$ L+2 | 2.7     |                     |     |  |  |  |
|               |                                          |                        |                        |                     |                                                  | H-4 $\rightarrow$ L+5  | 2.5                   |         |                                                | H-4 $\rightarrow$ L+5  | 2.4                   |         |                     |     |  |  |  |
|               |                                          |                        |                        |                     |                                                  | H-4 $\rightarrow$ L+5  | 2.5                   |         |                                                | H $\rightarrow$ L      | 2.3                   |         |                     |     |  |  |  |
| 2             | 3.72                                     | 1.397                  | H-1 $\rightarrow$ L    | 77.6                | 3.68                                             | 1.376                  | H $\rightarrow$ L     | 79.6    | 3.65                                           | 1.336                  | H $\rightarrow$ L     | 75.7    |                     |     |  |  |  |
|               |                                          |                        | H $\rightarrow$ L+1    | 18.7                |                                                  |                        | H-1 $\rightarrow$ L+1 | 16.6    |                                                |                        | H-1 $\rightarrow$ L+1 | 14.2    |                     |     |  |  |  |
|               |                                          |                        | H-6 $\rightarrow$ L    | 2.2                 |                                                  |                        | H-5 $\rightarrow$ L   | 2.1     |                                                |                        | H-1 $\rightarrow$ L   | 3.3     |                     |     |  |  |  |
| 3             | 3.98                                     | 0.418                  | H $\rightarrow$ L      | 81.1                | 3.96                                             | 0.413                  | H-1 $\rightarrow$ L   | 82.4    | 3.95                                           | 0.402                  | H-1 $\rightarrow$ L   | 79.4    |                     |     |  |  |  |
|               |                                          |                        | H-1 $\rightarrow$ L+1  | 16.2                |                                                  |                        | H $\rightarrow$ L+1   | 14.5    |                                                |                        | H $\rightarrow$ L+1   | 12.3    |                     |     |  |  |  |
|               |                                          |                        |                        |                     |                                                  |                        |                       |         |                                                | H $\rightarrow$ L      | 3.5                   |         |                     |     |  |  |  |
| 4             | 4.76                                     | 0.078                  | H $\rightarrow$ L+1    | 70.7                | 4.74                                             | 0.049                  | H $\rightarrow$ L+1   | 48.1    | 4.71                                           | 0.032                  | H $\rightarrow$ L+1   | 54.4    |                     |     |  |  |  |
|               |                                          |                        | H-1 $\rightarrow$ L    | 15.0                |                                                  |                        | H-1 $\rightarrow$ L+1 | 26.4    |                                                |                        | H-1 $\rightarrow$ L+1 | 21.3    |                     |     |  |  |  |
|               |                                          |                        | H-1 $\rightarrow$ L+2  | 4.8                 |                                                  |                        | H-1 $\rightarrow$ L   | 6.6     |                                                |                        | H-1 $\rightarrow$ L   | 11.8    |                     |     |  |  |  |
|               |                                          |                        | H-6 $\rightarrow$ L    | 2.8                 |                                                  |                        | H $\rightarrow$ L     | 5.7     |                                                |                        | H-1 $\rightarrow$ L+2 | 5.2     |                     |     |  |  |  |
|               |                                          |                        |                        |                     |                                                  |                        |                       |         |                                                |                        | H-1 $\rightarrow$ L+2 | 3.2     |                     |     |  |  |  |
|               |                                          |                        |                        |                     |                                                  | H $\rightarrow$ L+2    | 2.2                   |         |                                                |                        |                       |         |                     |     |  |  |  |
| 5             | 4.77                                     | 0.014                  | H-1 $\rightarrow$ L+1  | 71.7                | 4.75                                             | 0.063                  | H-1 $\rightarrow$ L+1 | 47.5    | 4.72                                           | 0.088                  | H-1 $\rightarrow$ L+1 | 53.4    |                     |     |  |  |  |
|               |                                          |                        | H $\rightarrow$ L      | 13.2                |                                                  |                        | H $\rightarrow$ L+1   | 26.9    |                                                |                        | H $\rightarrow$ L+1   | 22.2    |                     |     |  |  |  |
|               |                                          |                        | H $\rightarrow$ L+2    | 5.6                 |                                                  |                        | H $\rightarrow$ L     | 7.4     |                                                |                        | H $\rightarrow$ L     | 11.7    |                     |     |  |  |  |
|               |                                          |                        | H-5 $\rightarrow$ L    | 2.6                 |                                                  |                        | H-1 $\rightarrow$ L   | 5.1     |                                                |                        | H $\rightarrow$ L+2   | 5.1     |                     |     |  |  |  |
|               |                                          |                        |                        |                     |                                                  |                        |                       |         |                                                |                        | H $\rightarrow$ L+2   | 2.8     | H-5 $\rightarrow$ L | 2.1 |  |  |  |
|               |                                          |                        |                        |                     |                                                  | H-1 $\rightarrow$ L+2  | 2.4                   |         |                                                |                        |                       |         |                     |     |  |  |  |
|               |                                          |                        |                        |                     |                                                  | H-5 $\rightarrow$ L    | 2.1                   |         |                                                |                        |                       |         |                     |     |  |  |  |
| 6             | 4.93                                     | 0.011                  | H-3 $\rightarrow$ L    | 13.6                | 4.92                                             | 0.011                  | H-3 $\rightarrow$ L   | 24.5    | 4.90                                           | 0.010                  | H-3 $\rightarrow$ L   | 40.1    |                     |     |  |  |  |
|               |                                          |                        | H-3 $\rightarrow$ L+1  | 12.7                |                                                  |                        | H-2 $\rightarrow$ L   | 12.6    |                                                |                        | H-3 $\rightarrow$ L+1 | 22.1    |                     |     |  |  |  |
|               |                                          |                        | H-2 $\rightarrow$ L    | 11.3                |                                                  |                        | H-3 $\rightarrow$ L+1 | 12.3    |                                                |                        | H $\rightarrow$ L+3   | 6.7     |                     |     |  |  |  |
|               |                                          |                        | H $\rightarrow$ L+4    | 11.1                |                                                  |                        | H-2 $\rightarrow$ L+1 | 11.4    |                                                |                        | H $\rightarrow$ L+5   | 6.1     |                     |     |  |  |  |
|               |                                          |                        | H-2 $\rightarrow$ L+1  | 10.9                |                                                  |                        | H $\rightarrow$ L+5   | 7.8     |                                                |                        | H $\rightarrow$ L+2   | 3.5     |                     |     |  |  |  |
|               |                                          |                        | H-1 $\rightarrow$ L+5  | 6.8                 |                                                  |                        | H-1 $\rightarrow$ L+3 | 6.9     |                                                |                        | H-3 $\rightarrow$ L+2 | 3.2     |                     |     |  |  |  |
|               |                                          |                        | H-1 $\rightarrow$ L+2  | 5.5                 |                                                  |                        | H-1 $\rightarrow$ L+4 | 4.9     |                                                |                        | H-1 $\rightarrow$ L+3 | 2.6     |                     |     |  |  |  |
|               |                                          |                        |                        |                     |                                                  |                        | H $\rightarrow$ L+2   | 4.6     |                                                |                        |                       |         |                     |     |  |  |  |
|               |                                          |                        |                        |                     |                                                  |                        |                       |         |                                                |                        | H-3 $\rightarrow$ L+2 | 2.2     |                     |     |  |  |  |
|               |                                          |                        |                        |                     |                                                  |                        |                       |         |                                                |                        |                       |         |                     |     |  |  |  |
| 7             | 4.93                                     | 0.005                  | H-2 $\rightarrow$ L    | 23.8                | 4.92                                             | 0.005                  | H-2 $\rightarrow$ L   | 24.8    | 4.91                                           | 0.008                  | H-2 $\rightarrow$ L   | 36.2    |                     |     |  |  |  |
|               |                                          |                        | H-2 $\rightarrow$ L+1  | 12.7                |                                                  |                        | H-3 $\rightarrow$ L   | 12.4    |                                                |                        | H-2 $\rightarrow$ L+1 | 25.0    |                     |     |  |  |  |
|               |                                          |                        | H-1 $\rightarrow$ L+4  | 11.5                |                                                  |                        | H-2 $\rightarrow$ L+1 | 12.2    |                                                |                        | H-1 $\rightarrow$ L+3 | 7.5     |                     |     |  |  |  |
|               |                                          |                        | H-3 $\rightarrow$ L    | 11.2                |                                                  |                        | H-3 $\rightarrow$ L+1 | 11.5    |                                                |                        | H-1 $\rightarrow$ L+5 | 5.3     |                     |     |  |  |  |
|               |                                          |                        | H-3 $\rightarrow$ L+1  | 11.0                |                                                  |                        | H-1 $\rightarrow$ L+5 | 7.4     |                                                |                        | H-2 $\rightarrow$ L+2 | 3.3     |                     |     |  |  |  |
|               |                                          |                        | H $\rightarrow$ L+5    | 6.6                 |                                                  |                        | H $\rightarrow$ L+3   | 7.2     |                                                |                        | H $\rightarrow$ L+3   | 3.2     |                     |     |  |  |  |
|               |                                          |                        | H $\rightarrow$ L+2    | 4.5                 |                                                  |                        | H $\rightarrow$ L+4   | 5.1     |                                                |                        | H-1 $\rightarrow$ L+2 | 3.0     |                     |     |  |  |  |
|               |                                          |                        | H-1 $\rightarrow$ L+1  | 2.0                 |                                                  |                        | H-1 $\rightarrow$ L+2 | 3.8     |                                                |                        | H-2 $\rightarrow$ L+5 | 2.0     |                     |     |  |  |  |
|               |                                          |                        |                        |                     |                                                  |                        | H-2 $\rightarrow$ L+2 | 2.2     |                                                |                        |                       |         |                     |     |  |  |  |
|               |                                          |                        |                        |                     |                                                  |                        |                       |         |                                                |                        |                       |         |                     |     |  |  |  |
| 8             | 5.50                                     | 0.002                  | H-4 $\rightarrow$ L+1  | 67.1                | 5.54                                             | 0.014                  | H-4 $\rightarrow$ L+1 | 36.6    | 5.55                                           | 0.020                  | H-5 $\rightarrow$ L   | 29.7    |                     |     |  |  |  |
|               |                                          |                        | H-6 $\rightarrow$ L    | 11.9                |                                                  |                        | H-5 $\rightarrow$ L   | 26.8    |                                                |                        | H-4 $\rightarrow$ L+1 | 28.4    |                     |     |  |  |  |
|               |                                          |                        | H-4 $\rightarrow$ L+10 | 3.0                 |                                                  |                        | H $\rightarrow$ L+2   | 9.9     |                                                |                        | H $\rightarrow$ L+2   | 12.3    |                     |     |  |  |  |
|               |                                          |                        | H-1 $\rightarrow$ L+2  | 2.8                 |                                                  |                        | H-1 $\rightarrow$ L+3 | 3.4     |                                                |                        | H-1 $\rightarrow$ L+3 | 5.4     |                     |     |  |  |  |
|               |                                          |                        |                        |                     |                                                  |                        | H-3 $\rightarrow$ L   | 3.2     |                                                |                        | H-3 $\rightarrow$ L   | 4.0     |                     |     |  |  |  |
|               |                                          | H-2 $\rightarrow$ L    | 2.3                    | H-2 $\rightarrow$ L | 3.0                                              |                        |                       |         |                                                |                        |                       |         |                     |     |  |  |  |
| 9             | 5.63                                     | 0.080                  | H-1 $\rightarrow$ L+2  | 21.6                | 5.66                                             | 0.014                  | H-1 $\rightarrow$ L+2 | 20.4    | 5.65                                           | 0.015                  | H $\rightarrow$ L+3   | 18.4    |                     |     |  |  |  |
|               |                                          |                        | H-5 $\rightarrow$ L+1  | 12.0                |                                                  |                        | H $\rightarrow$ L+3   | 13.5    |                                                |                        | H-1 $\rightarrow$ L+2 | 16.4    |                     |     |  |  |  |
|               |                                          |                        | H-6 $\rightarrow$ L    | 11.2                |                                                  |                        | H-2 $\rightarrow$ L   | 12.6    |                                                |                        | H-3 $\rightarrow$ L   | 14.7    |                     |     |  |  |  |
|               |                                          |                        | H-4 $\rightarrow$ L+1  | 10.6                |                                                  |                        | H-6 $\rightarrow$ L   | 10.4    |                                                |                        | H-6 $\rightarrow$ L   | 8.1     |                     |     |  |  |  |
|               |                                          |                        | H $\rightarrow$ L+4    | 9.8                 |                                                  |                        | H-3 $\rightarrow$ L   | 9.5     |                                                |                        | H-2 $\rightarrow$ L   | 7.2     |                     |     |  |  |  |
|               |                                          |                        | H-3 $\rightarrow$ L    | 7.9                 |                                                  |                        | H $\rightarrow$ L+4   | 7.7     |                                                |                        | H $\rightarrow$ L+2   | 5.1     |                     |     |  |  |  |
|               |                                          |                        | H-2 $\rightarrow$ L    | 5.9                 |                                                  |                        | H-1 $\rightarrow$ L+5 | 4.7     |                                                |                        | H-1 $\rightarrow$ L+5 | 3.6     |                     |     |  |  |  |
|               |                                          |                        | H $\rightarrow$ L+10   | 2.5                 |                                                  |                        | H-5 $\rightarrow$ L+1 | 4.5     |                                                |                        | H-5 $\rightarrow$ L+1 | 3.2     |                     |     |  |  |  |
|               |                                          |                        | H $\rightarrow$ L+3    | 2.5                 |                                                  |                        | H-4 $\rightarrow$ L   | 3.6     |                                                |                        | H-4 $\rightarrow$ L   | 3.1     |                     |     |  |  |  |
|               |                                          |                        |                        |                     |                                                  |                        |                       |         |                                                |                        | H-4 $\rightarrow$ L+1 | 3.0     |                     |     |  |  |  |
| 10            | 5.66                                     | 0.014                  | H $\rightarrow$ L+2    | 21.4                | 5.66                                             | 0.083                  | H-4 $\rightarrow$ L+1 | 31.9    | 5.67                                           | 0.079                  | H-4 $\rightarrow$ L+1 | 31.6    |                     |     |  |  |  |
|               |                                          |                        | H-1 $\rightarrow$ L+4  | 17.9                |                                                  |                        | H $\rightarrow$ L+2   | 16.9    |                                                |                        | H $\rightarrow$ L+2   | 12.2    |                     |     |  |  |  |
|               |                                          |                        | H-2 $\rightarrow$ L    | 12.7                |                                                  |                        | H-6 $\rightarrow$ L+1 | 10.9    |                                                |                        | H-1 $\rightarrow$ L+3 | 10.7    |                     |     |  |  |  |
|               |                                          |                        | H-5 $\rightarrow$ L    | 10.8                |                                                  |                        | H-1 $\rightarrow$ L+3 | 7.8     |                                                |                        | H-2 $\rightarrow$ L   | 10.6    |                     |     |  |  |  |
|               |                                          |                        | H-3 $\rightarrow$ L    | 9.7                 |                                                  |                        | H-3 $\rightarrow$ L   | 6.9     |                                                |                        | H-6 $\rightarrow$ L+1 | 8.1     |                     |     |  |  |  |
|               |                                          |                        | H-6 $\rightarrow$ L+1  | 4.5                 |                                                  |                        | H-2 $\rightarrow$ L   | 5.0     |                                                |                        | H-1 $\rightarrow$ L+2 | 4.5     |                     |     |  |  |  |
|               |                                          |                        | H $\rightarrow$ L+5    | 3.7                 |                                                  |                        | H-1 $\rightarrow$ L+4 | 3.1     |                                                |                        | H-3 $\rightarrow$ L   | 2.2     |                     |     |  |  |  |
|               |                                          |                        | H-1 $\rightarrow$ L+3  | 3.2                 |                                                  |                        |                       |         |                                                |                        |                       |         |                     |     |  |  |  |
|               |                                          |                        | H-3 $\rightarrow$ L+1  | 2.6                 |                                                  |                        |                       |         |                                                |                        |                       |         |                     |     |  |  |  |

<sup>a</sup>  $\kappa$ , is the dielectric constant for the solvent; <sup>b</sup> H=HOMO, L=LUMO. <sup>c</sup> O Str, oscillator strength; <sup>d</sup> Probability;
